# Supplementary material
Source: ML conference proceedings conference paper supplement (https://openaccess.thecvf.com/content/CVPR2023/html/Dou_GaitGCI_Generative_Counterfactual_CVPR_2023_paper.html)
Supplement: Supplementary file 1 [file Dou_GaitGCI_Generative_Counterfactual_CVPR_2023_supplemental.pdf]

# GaitGCI: Generative Counterfactual Intervention for Gait Recognition

## –Supplementary Materials–

### A. Implementation Details

#### A.1. Low-rank Backbone

To improve the efficiency and alleviate the learning difficulty, we adopt the backbone with four layers of low-rank 3D convolution, where each layer is implemented by sequential  $1 \times 1 \times 3$ ,  $1 \times 3 \times 1$ , and  $3 \times 1 \times 1$  convolutions as shown in Fig. 1. Low-rank convolution could efficiently save 2/3 parameters while reducing the redundancy of 3D convolution. One temporal downsampling layer with kernel size of 3 and one spatial downsampling layer with kernel size of 2 are performed after the first layer and the second layer, respectively.

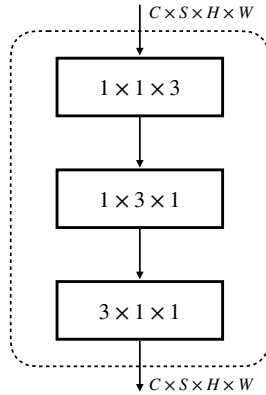

Figure 1. Illustration of low-rank 3D convolution, which aims to improve the efficiency and reduce the redundancy of 3D convolution.

#### A.2. More Details

The data pre-processing method is from [1]. The input resolution of all datasets is  $64 \times 44$ , and we report extra results under the resolution of  $128 \times 88$  on Gait3D. The margin of triplet loss is set to 0.2. The frame is set to 30 at the training stage, while it is unfixed at the inference stage. All experiments are implemented by Pytorch with Nvidia 3090 GPUs.

### B. Details of DCDC

#### B.1. Derivative of Schatten 1-norm.

Schatten 1-norm  $\|\mathbf{W}\|_{S_1}$  is the convex approximation to rank function  $Rank(\mathbf{W})$  and is differentiable. First, we decompose  $\mathbf{W}$  as  $\mathbf{U}\mathbf{\Sigma}\mathbf{V}^T$  based on singular value decomposition (SVD) assumption. Then,  $\partial\mathbf{W}$  could be obtained as follows:

$$\partial\mathbf{W} = (\partial\mathbf{U})\mathbf{\Sigma}\mathbf{V}^T + \mathbf{U}(\partial\mathbf{\Sigma})\mathbf{V}^T + \mathbf{U}\mathbf{\Sigma}(\partial\mathbf{V}^T). \quad (1)$$

Next,  $\partial\mathbf{\Sigma}$  should be figured out, and it could be represented as:

$$\partial\mathbf{\Sigma} = \mathbf{U}^T\partial(\mathbf{W})\mathbf{V} - \mathbf{U}^T(\partial\mathbf{U})\mathbf{\Sigma} - \mathbf{\Sigma}(\partial\mathbf{V}^T)\mathbf{V} = \mathbf{U}^T(\partial\mathbf{W})\mathbf{V}, \quad (2)$$

where  $(-\mathbf{U}^T(\partial\mathbf{U})\Sigma - \Sigma(\partial\mathbf{V}^T)\mathbf{V}) = 0$ . Thus, the process of the derivative on  $\|\cdot\|_{S_1}$  could be accomplished as follows:

$$\frac{\partial\|\mathbf{W}\|_{S_1}}{\partial\mathbf{W}} = \frac{\text{tr}(\partial\Sigma)}{\partial\mathbf{W}} = \frac{\text{tr}(\mathbf{U}^T(\partial\mathbf{W})\mathbf{V})}{\partial\mathbf{W}} = \frac{\text{tr}(\mathbf{V}\mathbf{U}^T(\partial\mathbf{W}))}{\partial\mathbf{W}} = (\mathbf{V}\mathbf{U}^T)^T = \mathbf{U}\mathbf{V}^T. \quad (3)$$

## B.2. Complexity Analysis of DCDC

We omit the kernel size for simplicity. For parameter complexity, static convolution and dynamic convolution require  $C^2$  and  $KC^2(K \geq 4)$ , respectively. By contrast, DCDC requires sample-agnostic kernel  $\mathbf{W}_0$  and sample-adaptive kernel  $\mathbf{P}\Phi(\mathbf{X})\mathbf{Q}^T$  with  $C^2$  and  $(2CL + (C + L^2)\frac{C}{r})$  parameters, respectively.  $\mathbf{P}/\mathbf{Q}$  is implemented by convolutions and  $\Phi(\mathbf{X})$  is implemented by MLP. The parameters of DCDC is summarized as:

$$\text{Parameter}_{DCDC} = C^2 + 2CL + (C + L^2)\frac{C}{r} < (1 + \frac{2}{r})C^2 + 2C\sqrt{C}(L^2 < C). \quad (4)$$

Therefore, DCDC is more parameter-efficient than dynamic convolution while using similar computation costs.

## C. Detailed Results

### C.1. Results of Each View on CASIA-B.

The performance under NM, BG, CL, and Mean condition is shown in the main manuscript. Further, the detailed cross-view performance is shown in Tab. 1. GaitGCI efficiently outperforms state-of-the-art performance at almost all viewpoints, which indicates the superior cross-view retrieval ability of GaitGCI.

Table 1. Averaged rank-1 accuracy on CASIA-B without identical views cases, including GaitSet [1], GaitPart [2], MT3D [5], CSTL [3], 3DLocal [4], and GaitGL [6].

| Gallery NM #1-4 |          | 0°-180°     |             |             |             |             |             |             |             |             |             |             | Mean        |
|-----------------|----------|-------------|-------------|-------------|-------------|-------------|-------------|-------------|-------------|-------------|-------------|-------------|-------------|
| Probe           | Method   | 0°          | 18°         | 36°         | 54°         | 72°         | 90°         | 108°        | 126°        | 144°        | 162°        | 180°        |             |
| NM              | GaitSet  | 90.8        | 97.9        | 99.4        | 96.9        | 93.6        | 91.7        | 95.0        | 97.8        | 98.9        | 96.8        | 85.8        | 95.0        |
|                 | GaitPart | 94.1        | 98.6        | 99.3        | 98.5        | 94.0        | 92.3        | 95.9        | 98.4        | 99.2        | 97.8        | 90.4        | 96.2        |
|                 | MT3D     | 95.7        | 98.2        | 99.0        | 97.5        | 95.1        | 93.9        | 96.1        | 98.6        | 99.2        | 98.2        | 92.0        | 96.7        |
|                 | CSTL     | 97.2        | 99.0        | 99.1        | 98.0        | 96.3        | 95.6        | 97.1        | 98.7        | 99.2        | 98.9        | 96.7        | 97.9        |
|                 | 3DLocal  | 96.0        | <b>99.0</b> | <b>99.5</b> | <b>98.9</b> | 97.1        | 94.2        | 96.3        | 99.0        | 98.8        | 98.5        | 95.2        | 97.5        |
|                 | GaitGL   | 96.0        | 98.3        | 99.0        | 97.9        | 96.9        | 95.4        | 97.0        | 98.9        | <b>99.3</b> | 98.8        | 94.0        | 97.4        |
|                 | Ours     | <b>97.3</b> | 98.6        | 99.2        | 98.2        | <b>97.3</b> | <b>95.7</b> | <b>97.1</b> | <b>99.2</b> | 99.0        | <b>99.1</b> | <b>96.8</b> | <b>97.9</b> |
|                 | BG       | GaitSet     | 83.8        | 91.2        | 91.8        | 88.8        | 83.3        | 81.0        | 84.1        | 90.0        | 92.2        | 94.4        | 79.0        |
| GaitPart        |          | 89.1        | 94.8        | 96.7        | 95.1        | 88.3        | 84.9        | 89.0        | 93.5        | 96.1        | 93.8        | 85.8        | 91.5        |
| MT3D            |          | 91.0        | 95.4        | 97.5        | 94.2        | 92.3        | 86.9        | 91.2        | 95.6        | 97.3        | 96.4        | 86.6        | 93.0        |
| CSTL            |          | 91.7        | 96.5        | 97.0        | 95.4        | 90.9        | 88.0        | 91.5        | 95.8        | 97.0        | 95.5        | 90.3        | 93.6        |
| 3DLocal         |          | 92.9        | 95.9        | 97.8        | 96.2        | 93.0        | 87.8        | 92.7        | 96.3        | 97.9        | 98.0        | 88.5        | 94.3        |
| GaitGL          |          | 92.6        | 96.6        | 96.8        | 95.5        | 93.5        | 89.3        | 92.2        | 96.5        | 98.2        | 96.9        | 91.5        | 94.5        |
| Ours            |          | <b>93.2</b> | <b>96.8</b> | <b>97.6</b> | <b>96.2</b> | <b>93.9</b> | <b>90.5</b> | <b>93.7</b> | <b>96.8</b> | <b>98.3</b> | <b>97.2</b> | <b>91.7</b> | <b>95.0</b> |
| CL              |          | GaitSet     | 61.4        | 75.4        | 80.7        | 77.3        | 72.1        | 70.1        | 71.5        | 73.5        | 73.5        | 68.4        | 50.0        |
|                 | GaitPart | 70.7        | 85.5        | 86.9        | 83.3        | 77.1        | 72.5        | 76.9        | 82.2        | 83.8        | 80.2        | 66.5        | 78.7        |
|                 | MT3D     | 76.0        | 87.6        | 89.8        | 85.0        | 81.2        | 75.7        | 81.0        | 84.5        | 85.4        | 82.2        | 68.1        | 81.5        |
|                 | CSTL     | 78.1        | 89.4        | 91.6        | 86.6        | 82.1        | 79.9        | 81.8        | 86.3        | 88.7        | 86.6        | 75.3        | 84.2        |
|                 | 3DLocal  | 78.2        | 90.2        | 92.0        | 87.1        | 83.0        | 76.8        | 83.1        | 86.6        | 86.8        | 84.1        | 70.9        | 83.7        |
|                 | GaitGL   | 76.6        | 90.0        | 90.3        | 87.1        | 84.5        | 79.0        | 84.1        | 87.0        | 87.3        | 84.4        | 69.5        | 83.6        |
|                 | Ours     | <b>81.1</b> | <b>91.3</b> | <b>93.2</b> | <b>90.4</b> | <b>85.7</b> | <b>80.6</b> | <b>87.1</b> | <b>88.3</b> | <b>89.3</b> | <b>87.3</b> | <b>75.5</b> | <b>86.4</b> |

### C.2. Results on GREW Competition.

The screenshot of the results on GREW competition is shown in Fig. 2. GaitGCI efficiently achieves 3<sup>th</sup> in GREW competition only using silhouette, which indicates the necessity and effectiveness of alleviating the confounders for practical application.

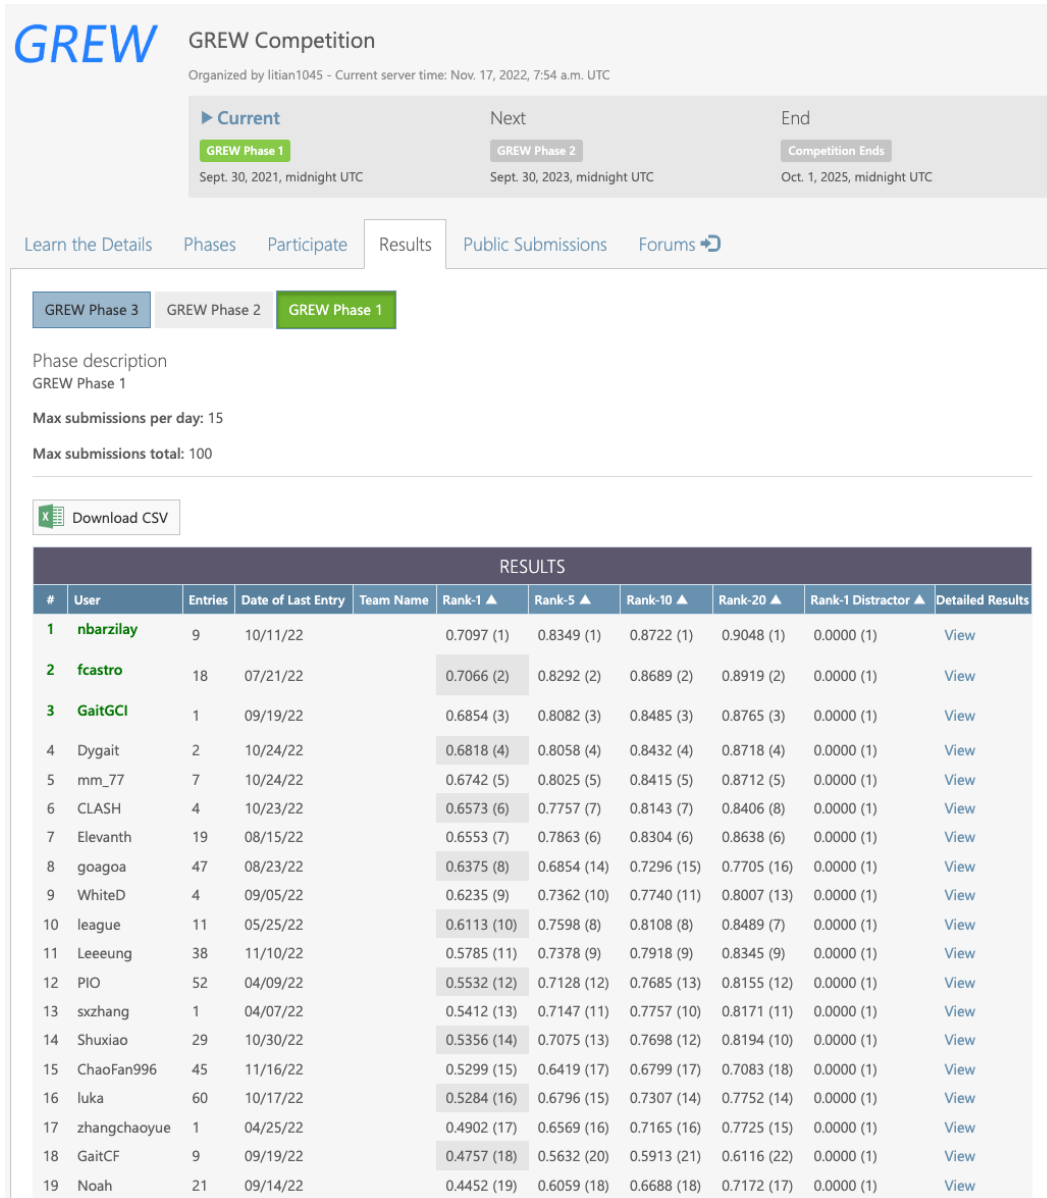

Figure 2. The screenshots of the results on GREW competition, where proposed GaitGCI achieves 3<sup>th</sup> among these methods.

## D. Ethical Statements

In our research, we pay great attention to bio-information security and ethics. We should use gait recognition technology to affect social development and human happiness positively.

## References

- [1] Hanqing Chao, Yiwei He, Junping Zhang, and Jianfeng Feng. GaitSet: Regarding gait as a set for cross-view gait recognition. In *AAAI*, 2019. 1, 2
- [2] Chao Fan, Yunjie Peng, Chunshui Cao, Xu Liu, Saihui Hou, Jiannan Chi, Yongzhen Huang, Qing Li, and Zhiqiang He. Gaitpart: Temporal part-based model for gait recognition. In *IEEE Conf. Comput. Vis. Pattern Recog.*, 2020. 2
- [3] Xiaohu Huang, Duowang Zhu, Hao Wang, Xinggong Wang, Bo Yang, Botao He, Wenyu Liu, and Bin Feng. Context-sensitive temporal feature learning for gait recognition. In *Int. Conf. Comput. Vis.*, pages 12909–12918, October 2021. 2

- [4] Zhen Huang, Dixiu Xue, Xu Shen, Xinmei Tian, Houqiang Li, Jianqiang Huang, and Xian-Sheng Hua. 3d local convolutional neural networks for gait recognition. In *Int. Conf. Comput. Vis.*, pages 14920–14929, October 2021. [2](#)
- [5] Beibei Lin, Shunli Zhang, and Feng Bao. Gait recognition with multiple-temporal-scale 3d convolutional neural network. In *ACM Int. Conf. Multimedia*, pages 3054–3062, 2020. [2](#)
- [6] Beibei Lin, Shunli Zhang, and Xin Yu. Gait recognition via effective global-local feature representation and local temporal aggregation. In *Int. Conf. Comput. Vis.*, pages 14648–14656, October 2021. [2](#)
